# Supplementary material
Source: MDPI journal article supplement (https://www.mdpi.com/2071-1050/13/9/5305)
Supplement: s1 [file s1]

**Table S4 Quality scores assessing the risk of bias using a modified Newcastle-Ottawa scale**

| Study type: Cross-sectional; Score: 1=achieved, 0=not achieved |                                     |             |                 |                                  |                                                                                       |                              |                                      |                |
|----------------------------------------------------------------|-------------------------------------|-------------|-----------------|----------------------------------|---------------------------------------------------------------------------------------|------------------------------|--------------------------------------|----------------|
| Authors                                                        | Representativeness<br>of the sample | Sample size | Non-respondents | Ascertainment of<br>the exposure | Comparability of subjects in different<br>outcome groups (control for<br>confounding) | Assessment of<br>the outcome | A statistical test<br>is appropriate | Total<br>score |
| Liu, 2020                                                      | 1                                   | 1           | 1               | 1                                | 1                                                                                     | 1                            | 1                                    | 7              |
| Xu, 2020                                                       | 1                                   | 1           | 0               | 1                                | 1                                                                                     | 1                            | 1                                    | 6              |
| Sun, 2020                                                      | 0                                   | 1           | 1               | 1                                | 1                                                                                     | 1                            | 1                                    | 6              |
| Hu, 2020                                                       | 1                                   | 1           | 1               | 1                                | 1                                                                                     | 1                            | 1                                    | 7              |
| Liu, 2020                                                      | 0                                   | 1           | 1               | 1                                | 1                                                                                     | 1                            | 1                                    | 6              |
| Zhang, 2020                                                    | 0                                   | 1           | 1               | 1                                | 1                                                                                     | 1                            | 1                                    | 6              |
| Wang, 2020                                                     | 0                                   | 1           | 1               | 1                                | 1                                                                                     | 1                            | 1                                    | 6              |
| Zhou, 2020                                                     | 0                                   | 1           | 0               | 1                                | 1                                                                                     | 1                            | 1                                    | 5              |
| Lian, 2020                                                     | 1                                   | 1           | 1               | 1                                | 1                                                                                     | 1                            | 1                                    | 7              |
| Bi, 2020                                                       | 0                                   | 1           | 1               | 1                                | 1                                                                                     | 1                            | 1                                    | 6              |
| Hu, 2020                                                       | 1                                   | 1           | 1               | 1                                | 1                                                                                     | 1                            | 1                                    | 7              |
| Huang, 2020                                                    | 0                                   | 1           | 1               | 1                                | 1                                                                                     | 1                            | 1                                    | 6              |
| Cai, 2020                                                      | 0                                   | 1           | 1               | 1                                | 1                                                                                     | 1                            | 1                                    | 6              |
| Zhou, 2020                                                     | 0                                   | 1           | 1               | 1                                | 1                                                                                     | 1                            | 1                                    | 6              |
| Hu, 2020                                                       | 0                                   | 1           | 1               | 1                                | 1                                                                                     | 1                            | 1                                    | 6              |
| Cen, 2020                                                      | 0                                   | 1           | 1               | 1                                | 1                                                                                     | 1                            | 1                                    | 6              |
| He, 2020                                                       | 0                                   | 1           | 1               | 1                                | 1                                                                                     | 1                            | 1                                    | 6              |
| Wei, 2020                                                      | 0                                   | 1           | 1               | 1                                | 1                                                                                     | 1                            | 1                                    | 6              |
| Li, 2020                                                       | 0                                   | 1           | 0               | 1                                | 1                                                                                     | 1                            | 1                                    | 5              |

|             |   |   |   |   |   |   |   |   |
|-------------|---|---|---|---|---|---|---|---|
| Cheng, 2020 | 1 | 1 | 1 | 1 | 1 | 1 | 1 | 7 |
| Shao, 2020  | 0 | 1 | 1 | 1 | 1 | 1 | 1 | 6 |
| Gao, 2020   | 0 | 1 | 1 | 1 | 1 | 1 | 1 | 6 |
| Wang, 2020  | 1 | 1 | 1 | 1 | 1 | 1 | 1 | 7 |

---
