# Supplementary material
Source: MDPI journal article supplement (https://www.mdpi.com/2071-1050/13/9/5305)
Supplement: s1 [file s1]

**Table S2 The Extracted Determinants**

Gender

| Gender                                                     | OR    | 95%CI |        |
|------------------------------------------------------------|-------|-------|--------|
|                                                            |       | Lower | Higher |
| Liu 2020-disease progression<br>(Female reference)         | 1.914 | 0.512 | 7.156  |
| Xu 2020-severity<br>(Female reference)                     | 1.503 | 1.064 | 2.124  |
| Zhang 2020-severe<br>(Female reference)                    | 1.6   | 1.1   | 2.3    |
| Wang 2020-severe/<br>(Female reference)                    | 3.953 | 1.346 | 11.610 |
| Zhou 2020-patients<br>(Female reference)                   | 1.55  | 1.38  | 1.74   |
| Lian 2020-severe<br>(Male reference)                       | 0.332 | 0.150 | 0.739  |
| Bi 2020-severe<br>(female reference)                       | 1.30  | 0.82  | 2.07   |
| Hu2020-acquiring<br>and transmitting<br>(female reference) | 1.02  | 0.74  | 1.40   |
| Zhou2020-severe<br>(female reference)                      | 2.318 | 0.979 | 5.491  |
| Cen 2020-progression<br>(female reference)                 | 1.722 | 1.359 | 2.183  |
| Hu 2020-severe<br>(male reference)                         | 0.605 | 0.282 | 1.298  |
| Cheng 2020-critical<br>(male reference)                    | 1.19  | 0.65  | 2.24   |
| Wang 2020-severe<br>(female reference)                     | 2.38  | 1.37  | 4.11   |

Age

| Age                                                   | Variable value | OR     | 95%CI |        |
|-------------------------------------------------------|----------------|--------|-------|--------|
|                                                       |                |        | Lower | Higher |
| Liu 2020-disease progression<br>(<60 years reference) |                | 10.575 | 2.095 | 53.386 |
| Xu 2020-severity<br>(<40 reference =                  | 40–69          | 2.978  | 1.722 | 5.150  |
|                                                       | ≥70            | 8.492  | 4.548 | 15.857 |
| Hu 2020- disease severity<br>(years)                  |                | 1.03   | 1.01  | 1.06   |

|                                                           |             |       |       |        |
|-----------------------------------------------------------|-------------|-------|-------|--------|
| Liu 2020- severe<br>(years)                               | -           | 1.07  | 1.05  | 1.09   |
| Zhang 2020-severe<br>(≤18 reference)                      | ≥ 66        | 111.8 | 38.7  | 323.2  |
|                                                           | 41–65       | 29.0  | 11.2  | 74.0   |
|                                                           | 19–40       | 16.4  | 6.3   | 42.3   |
| Wang 2020-severe<br>(<60 reference=                       | ≥60         | 1.078 | 0.378 | 11.610 |
| Zhou 2020-patients<br>(≤19 reference)                     | 20-29       | 1.59  | 1.21  | 2.08   |
|                                                           | 30-39       | 1.51  | 1.18  | 1.93   |
|                                                           | 40-49       | 1.04  | 0.81  | 1.33   |
|                                                           | 50-59       | 0.76  | 0.59  | 0.97   |
|                                                           | ≥60         | 0.48  | 0.37  | 0.62   |
| Bi 2020-severe<br>(50–59 years)                           | 0–9 years   | 0.88  | 0.30  | 2.77   |
|                                                           | 10–19 years | 1.08  | 0.28  | 5.27   |
|                                                           | 20–29 years | 0.65  | 0.28  | 1.56   |
|                                                           | 30–39 years | 1.17  | 0.58  | 2.37   |
|                                                           | 40–49 years | 1.27  | 0.58  | 2.83   |
|                                                           | 60–69 years | 1.50  | 0.72  | 3.16   |
|                                                           | ≥70 years   | 1.41  | 0.45  | 5.43   |
| Hu2020-acquiring<br>and transmitting<br>(15-64 reference) | 0-14        | 0.25  | 0.04  | 1.75   |
|                                                           | 65+         | 0.64  | 0.26  | 1.59   |
| Zhou2020-severe<br>(year)                                 |             | 1.066 | 1.007 | 1.129  |
| Hu 2020-outcomes<br>(<65 reference=                       |             | 3.546 | 1.626 | 7.733  |
| Cen 2020-progression<br>(<65 reference=                   |             | 4.308 | 3.364 | 5.516  |
| He 2020-severe<br>(years)                                 |             | 1.063 | 1.033 | 1.095  |
| Wei 2020-severe<br>(years)                                |             | 1.038 | 1.009 | 1.068  |
| Li 2020-severe<br>(<65 reference=                         |             | 2.25  | 1.46  | 3.47   |
| Cheng 2020-critical<br>(years)                            |             | 2.03  | 1.61  | 2.62   |
| Shao 2020-severe<br>(years)                               |             | 1.055 | 1.024 | 1.086  |
| Wang 2020-progression<br>(≤40 reference)                  | >40         | 7.39  | 3.52  | 15.53  |

History of smoking (Never smoking reference)

| History of smoking | OR | 95%CI |        |
|--------------------|----|-------|--------|
|                    |    | Lower | Higher |

|                              |        |       |        |
|------------------------------|--------|-------|--------|
| Liu 2020-disease progression | 12.187 | 1.762 | 84.306 |
| Xu 2020-severity             | 0.671  | 0.336 | 1.340  |
| Xu 2020-severity             | 0.697  | 0.221 | 2.200  |
| Zhang 2020-severe            | 1.5    | 0.7   | 3.1    |
| Huang 2020-illness           | 3.185  | 1.600 | 6.343  |
| Hu 2020-outcomes             | 3.464  | 1.18  | 10.166 |
| Cen 2020-progression         | 0.511  | 0.317 | 0.823  |
| Gao 2020- occurrence         | 0.83   | 0.46  | 1.52   |

Secondhand smoking exposure > 1h per day

| Secondhand smoking exposure (> 1h per day)   | OR   | 95%CI |        |
|----------------------------------------------|------|-------|--------|
|                                              |      | Lower | Higher |
| Gao 2020- occurrence (≤1h per day reference) | 0.66 | 0.30  | 1.20   |

Low-dose alcohol intake

| Low-dose alcohol intake                    | OR   | 95%CI |        |
|--------------------------------------------|------|-------|--------|
|                                            |      | Lower | Higher |
| Gao 2020- occurrence (high-dose reference) | 0.37 | 0.17  | 0.81   |

Fruits intake daily

| Fruits intake daily  | OR   | 95%CI |        |
|----------------------|------|-------|--------|
|                      |      | Lower | Higher |
| Gao 2020- occurrence | 0.20 | 0.12  | 0.36   |

Regular diets (No Regular diets reference)

| Regular diets        | OR   | 95%CI |        |
|----------------------|------|-------|--------|
|                      |      | Lower | Higher |
| Gao 2020- occurrence | 0.32 | 0.17  | 0.60   |

BMI

| BMI                                 | Variable value | OR   | 95%CI |        |
|-------------------------------------|----------------|------|-------|--------|
|                                     |                |      | Lower | Higher |
| Cai2020-sever (18.5-23.9 reference) | 24–27.9        | 1.78 | 1.00  | 3.21   |
|                                     | >28            | 3.35 | 1.47  | 7.63   |

Regular Exercise

| Regular Exercise                                      | OR    | 95%CI |        |
|-------------------------------------------------------|-------|-------|--------|
|                                                       |       | Lower | Higher |
| Huang2020-illness (Yes reference)                     | 2.929 | 1.425 | 6.022  |
| Gao2020-severe (Physical activities > 5 times a week) | 2.45  | 1.53  | 3.93   |

Lunch break daily (No lunch break)

| Lunch break daily | OR | 95%CI |
|-------------------|----|-------|
|-------------------|----|-------|

|                |      |       |        |
|----------------|------|-------|--------|
|                |      | Lower | Higher |
| Gao2020-severe | 0.55 | 0.33  | 0.90   |

#### Family cluster (No family cluster)

| Family cluster    | OR    | 95%CI |        |
|-------------------|-------|-------|--------|
|                   |       | Lower | Higher |
| Zhang 2020-severe | 0.5   | 0.3   | 0.8    |
| Wang 2020-severe  | 0.390 | 0.133 | 1.146  |

#### Cluster case (Not cluster case)

| Cluster case    | OR    | 95%CI |        |
|-----------------|-------|-------|--------|
|                 |       | Lower | Higher |
| Gao 2020-severe | 1.932 | 0.622 | 6.003  |

#### City of residence at the time of diagnosis

| City of residence at the time of diagnosis | OR   | 95%CI |        |
|--------------------------------------------|------|-------|--------|
|                                            |      | Lower | Higher |
| Zhou 2020-patients (other city reference)  | 1.19 | 1.03  | 1.39   |

#### Type of contact

| Type of contact                                                  | Variable value    | OR   | 95%CI |        |
|------------------------------------------------------------------|-------------------|------|-------|--------|
|                                                                  |                   |      | Lower | Higher |
| Hu2020-acquiring and transmitting (household contacts reference) | Relative contacts | 0.11 | 0.07  | 0.17   |
|                                                                  | Social contacts   | 0.06 | 0.03  | 0.11   |
|                                                                  | Other contacts    | 0.07 | 0.04  | 0.13   |

#### MET (metabolic equivalent of task) intensity classification

| MET (metabolic equivalent of task) intensity classification | Variable value | OR    | 95%CI |        |
|-------------------------------------------------------------|----------------|-------|-------|--------|
|                                                             |                |       | Lower | Higher |
| Huang 2020-illness (high reference)                         | moderate       | 0.213 | 0.119 | 0.382  |
|                                                             | low            | 0.069 | 0.026 | 0.186  |

#### Residence

| Residence                                  | OR     | 95%CI |         |
|--------------------------------------------|--------|-------|---------|
|                                            |        | Lower | Higher  |
| Zhou 2020-patients (local reference)       | 0.890  | 0.657 | 1.231   |
| Huang 2020-illness (other place reference) | 19.168 | 2.044 | 179.792 |

#### Generation of COVID-19 transmission

| Generation of COVID-19 | Variable value | OR | 95%CI |        |
|------------------------|----------------|----|-------|--------|
|                        |                |    | Lower | Higher |

|                                                  |                   |      |      |      |
|--------------------------------------------------|-------------------|------|------|------|
| transmission                                     |                   |      |      |      |
| Hu2020-acquiring and transmitting (G1 reference) | G2                | 0.13 | 0.06 | 0.31 |
|                                                  | G3-4              | 0.05 | 0.02 | 0.19 |
|                                                  | Multiple exposure | 0.10 | 0.03 | 0.41 |
|                                                  | Unknown           | 0.03 | 0.01 | 0.10 |

#### Infector's contacts

| Infector's contacts                        | OR   | 95%CI |        |
|--------------------------------------------|------|-------|--------|
|                                            |      | Lower | Higher |
| Hu2020-acquiring and transmitting (number) | 0.99 | 0.97  | 1.00   |

#### Symptomatic (No Symptomatic reference)

| Symptomatic    | OR   | 95%CI |        |
|----------------|------|-------|--------|
|                |      | Lower | Higher |
| Bi 2020-severe | 0.51 | 0.15  | 1.39   |

#### Surveillance method

| Surveillance method | OR   | 95%CI |        |
|---------------------|------|-------|--------|
|                     |      | Lower | Higher |
| Bi 2020-severe      | 0.67 | 0.37  | 1.17   |

#### Any other coexisting disorder (No any other coexisting disorder)

| Any other coexisting disorder | OR    | 95%CI |        |
|-------------------------------|-------|-------|--------|
|                               |       | Lower | Higher |
| Zhang 2020-severe             | 3.8   | 2.5   | 5.9    |
| Lian 2020-severe              | 3.066 | 1.454 | 6.465  |
| Huang 2020-illness            | 7.552 | 3.458 | 16.495 |
| Wei 2020-severe               | 3.121 | 1.369 | 7.112  |
| Shao 2020-severe              | 3.625 | 1.602 | 8.201  |
| Wang 2020-progression         | 2.86  | 1.87  | 4.38   |

#### Radiology manifestation (No radiology manifestation)

| Radiology manifestation | OR   | 95%CI |        |
|-------------------------|------|-------|--------|
|                         |      | Lower | Higher |
| Wang 2020-progression   | 5.38 | 1.89  | 15.35  |

#### Hypertension (No hypertension reference)

| Hypertension                 | Variable value | OR    | 95%CI |        |
|------------------------------|----------------|-------|-------|--------|
|                              |                |       | Lower | Higher |
| Liu 2020-disease progression |                | 2.259 | 0.394 | 12.958 |
| Xu 2020-severity             |                | 4.493 | 3.155 | 6.399  |
| Hu 2020- disease severity    | poor           | 2.77  | 1.17  | 6.54   |
| Liu 2020-sever               |                | 2.87  | 1.59  | 5.18   |

|                      |  |       |       |       |
|----------------------|--|-------|-------|-------|
| Zhang 2020-severe    |  | 4.9   | 3.0   | 7.8   |
| Cen 2020-progression |  | 2.540 | 2.011 | 3.209 |
| Hu 2020-severe       |  | 2.739 | 1.272 | 5.898 |
| Li 2020-severe       |  | 2.01  | 1.27  | 3.17  |
| Cheng 2020-critical  |  | 3.84  | 1.92  | 7.64  |
| Shao 2020-severe     |  | 3.250 | 1.293 | 8.169 |

#### Hypnotics

| Hypnotics        | OR    | 95%CI |        |
|------------------|-------|-------|--------|
|                  |       | Lower | Higher |
| Hu 2020-outcomes | 0.082 | 0.025 | 0.274  |

#### Diagnosis at critical status

| Diagnosis at critical status | OR    | 95%CI |        |
|------------------------------|-------|-------|--------|
|                              |       | Lower | Higher |
| Hu 2020-outcomes             | 7.390 | 2.056 | 26.569 |

#### Poor appetite (good appetite reference)

| Poor appetite             | OR   | 95%CI |        |
|---------------------------|------|-------|--------|
|                           |      | Lower | Higher |
| Hu 2020- disease severity | 3.16 | 1.22  | 8.17   |

#### Cardiovascular disease (No cardiovascular disease reference)

| Cardiovascular disease | OR    | 95%CI |        |
|------------------------|-------|-------|--------|
|                        |       | Lower | Higher |
| Xu 2020-severity       | 1.124 | 0.574 | 2.199  |
| Zhang 2020-severe      | 2.5   | 0.6   | 10.1   |
| Xu 2020-severity       | 1.159 | 0.458 | 2.931  |
| Cen 2020-progression   | 2.410 | 1.408 | 4.124  |
| He 2020-severe         | 2.686 | 1.248 | 5.780  |
| Cheng 2020-critical    | 6.39  | 1.76  | 25.87  |

#### Hepatitis B infection (No Hepatitis B infection)

| Hepatitis B infection | OR    | 95%CI |        |
|-----------------------|-------|-------|--------|
|                       |       | Lower | Higher |
| Cen 2020-progression  | 0.333 | 0.047 | 2.377  |

#### Diabetes (No diabetes reference)

| Diabetes                     | OR    | 95%CI |        |
|------------------------------|-------|-------|--------|
|                              |       | Lower | Higher |
| Liu 2020-disease progression | 4.741 | 0.695 | 32.350 |
| Xu 2020-severity             | 2.164 | 1.363 | 3.437  |
| Liu 2020-sever               | 3.28  | 1.52  | 7.07   |
| Zhang 2020-severe            | 2.4   | 1.2   | 4.6    |
| Hu 2020-outcomes             | 3.109 | 1.155 | 8.373  |
| Cen 2020-progression         | 2.920 | 2.224 | 3.835  |

|                     |        |       |        |
|---------------------|--------|-------|--------|
| Wei 2020-severe     | 10.120 | 2.742 | 37.347 |
| Cheng 2020-critical | 3.53   | 1.28  | 9.493  |

COPD (No COPD reference)

| COPD                 | OR    | 95%CI |        |
|----------------------|-------|-------|--------|
|                      |       | Lower | Higher |
| Xu 2020-severity     | 1.107 | 0.327 | 3.747  |
| Zhang 2020-severe    | 42.0  | 4.9   | 363.9  |
| Hu 2020-severe       | 6.296 | 1.007 | 39.354 |
| Cen 2020-progression | 3.582 | 2.478 | 5.178  |
| Cheng 2020-critical  | 1.29  | 0.19  | 5.81   |
| Gao 2020-severe      | 0.651 | 0.149 | 2.843  |

Fever (No fever reference)

| Fever              | OR    | 95%CI |        |
|--------------------|-------|-------|--------|
|                    |       | Lower | Higher |
| Xu 2020-severity   | 1.042 | 0.653 | 1.662  |
| Liu 2020-severe    | 2.42  | 1.26  | 4.64   |
| Zhang 2020-severe  | 4.3   | 2.6   | 7.1    |
| Wang 2020-severe   | 2.923 | 0.358 | 23.887 |
| Zhou 2020-patients | 0.92  | 0.78  | 1.08   |
| Bi 2020-severe     | 0.94  | 0.49  | 1.75   |
| Zhou2020-severe    | 9.127 | 1.176 | 70.816 |
| He 2020-severe     | 4.345 | 1.282 | 14.730 |

Duration of fever (days)

| Duration of fever (days) | OR   | 95%CI |        |
|--------------------------|------|-------|--------|
|                          |      | Lower | Higher |
| Shao 2020-severe         | 0.73 | 0.56  | 0.96   |

Cold (No cold reference)

| Cold               | OR   | 95%CI |        |
|--------------------|------|-------|--------|
|                    |      | Lower | Higher |
| Zhou 2020-patients | 0.73 | 0.56  | 0.96   |

Chest congestion (No Chest congestion)

| Chest congestion | OR    | 95%CI |        |
|------------------|-------|-------|--------|
|                  |       | Lower | Higher |
| Zhao 2020-severe | 1.548 | 0.644 | 3.723  |

Cough (No cough reference)

| Cough                        | OR    | 95%CI |        |
|------------------------------|-------|-------|--------|
|                              |       | Lower | Higher |
| Liu 2020-disease progression | 1.063 | 0.295 | 3.834  |
| Xu 2020-severity             | 1.039 | 0.726 | 1.487  |
| Liu 2020-severe              | 1.91  | 1.10  | 3.33   |

|                    |       |       |       |
|--------------------|-------|-------|-------|
| Zhang 2020-severe  | 2.7   | 1.8   | 4.1   |
| Wang 2020-severe   | 1.246 | 0.402 | 3.862 |
| Zhou 2020-patients | 0.96  | 0.83  | 1.11  |
| Lian 2020-severe   | 2.600 | 1.013 | 6.671 |
| Zhou2020-severe    | 0.559 | 0.237 | 1.318 |

Expectoration (No Expectoration)

| Expectoration   | OR    | 95%CI |        |
|-----------------|-------|-------|--------|
|                 |       | Lower | Higher |
| Zhou2020-severe | 1.483 | 0.590 | 3.727  |

Cancer (No cancer reference)

| Cancer              | OR    | 95%CI |        |
|---------------------|-------|-------|--------|
|                     |       | Lower | Higher |
| Zhang 2020-severe   | 7.3   | 1.5   | 35.2   |
| Xu 2020-severity    | 2.198 | 0.963 | 5.019  |
| Cheng 2020-critical | 12.18 | 1.52  | 249.22 |

Chronic liver disease (No Chronic liver disease reference)

| Chronic liver disease | OR   | 95%CI |        |
|-----------------------|------|-------|--------|
|                       |      | Lower | Higher |
| Zhang 2020-severe     | 1.6  | 0.6   | 3.9    |
| Cheng 2020-critical   | 4.02 | 0.73  | 22.30  |

Chronic kidney disease (No Chronic kidney disease reference)

| Chronic liver disease | OR    | 95%CI |        |
|-----------------------|-------|-------|--------|
|                       |       | Lower | Higher |
| He 2020-severe        | 9.769 | 2.307 | 41.376 |

Chronic renal disease (No Chronic renal disease reference)

| Chronic renal disease | OR    | 95%CI |        |
|-----------------------|-------|-------|--------|
|                       |       | Lower | Higher |
| Zhang 2020-severe     | 4.3   | 0.9   | 20.6   |
| Cen 2020-progression  | 3.057 | 1.513 | 6.174  |

Coronary artery disease (No Coronary artery disease)

| Coronary artery disease | OR    | 95%CI |        |
|-------------------------|-------|-------|--------|
|                         |       | Lower | Higher |
| Cen 2020-progression    | 2.459 | 1.719 | 3.520  |

Single onset (No single onset)

| Single onset   | OR   | 95%CI |        |
|----------------|------|-------|--------|
|                |      | Lower | Higher |
| Liu 2020-sever | 1.80 | 1.05  | 3.06   |
|                |      |       |        |

Temperature (°C)

| Temperature | OR | 95%CI |  |
|-------------|----|-------|--|
|-------------|----|-------|--|

|                |       | Lower | Higher |
|----------------|-------|-------|--------|
| Liu 2020-sever | 1.59  | 1.15  | 2.19   |
| Zhou2020-sever | 1.685 | 1.028 | 2.763  |

#### Maximum body temperature at admission

| Maximum body temperature at admission            | OR    | 95%CI |        |
|--------------------------------------------------|-------|-------|--------|
|                                                  |       | Lower | Higher |
| Liu 2020-disease progression (<37.3°C reference) | 9.709 | 1.176 | 83.330 |

#### Sputum production (No sputum production reference)

| Sputum production | OR    | 95%CI |        |
|-------------------|-------|-------|--------|
|                   |       | Lower | Higher |
| Xu 2020-severity  | 0.840 | 0.577 | 1.222  |
| Liu 2020-severe   | 1.91  | 1.12  | 3.27   |
| Zhang 2020-severe | 2.2   | 1.5   | 3.4    |
| Zhou2020-severe   | 1.483 | 0.590 | 3.727  |

#### Bilateral pneumonia

| Sputum production | OR    | 95%CI |        |
|-------------------|-------|-------|--------|
|                   |       | Lower | Higher |
| He 2020-severe    | 6.292 | 0.836 | 47.378 |

#### Chest pain (No Chest pain reference)

| Chest pain       | OR    | 95%CI |        |
|------------------|-------|-------|--------|
|                  |       | Lower | Higher |
| Xu 2020-severity | 1.080 | 0.495 | 2.356  |
| Zhao 2020-severe | 0.354 | 0.043 | 2.921  |

#### Fingertip oxygen saturation

| Fingertip oxygen saturation | OR    | 95%CI |        |
|-----------------------------|-------|-------|--------|
|                             |       | Lower | Higher |
| Wei 2020-severe             | 0.517 | 0.405 | 0.661  |

#### SOFA score

| SOFA score                        | Variable value | OR     | 95%CI |         |
|-----------------------------------|----------------|--------|-------|---------|
|                                   |                |        | Lower | Higher  |
| Cheng 2020-critical (0 reference) | 1              | N/A    | N/A   | N/A     |
|                                   | 2              | 14.68  | 3.43  | 102.01  |
|                                   | 3              | 36.64  | 8.66  | 256.66  |
|                                   | 4              | 108.50 | 16.22 | 1247.72 |
|                                   | 5              | 403.00 | 49.95 | 9761.98 |
|                                   | 6              | N/A    | N/A   | N/A     |
|                                   | 7              | N/A    | N/A   | N/A     |

#### Hemoptysis (No Hemoptysis reference)

| Hemoptysis        | OR  | 95%CI |        |
|-------------------|-----|-------|--------|
|                   |     | Lower | Higher |
| Zhang 2020-severe | 7.7 | 2.8   | 21.3   |

Sore throat (No sore throat reference)

| Sore throat       | OR    | 95%CI |        |
|-------------------|-------|-------|--------|
|                   |       | Lower | Higher |
| Liu 2020-sever    | 0.8   | 0.4   | 1.3    |
| Zhou 2020-paients | 1.11  | 0.84  | 1.48   |
| Zhou2020-severe   | 1.147 | 0.288 | 4.560  |
| Xu 2020-severity  | 0.400 | 0.170 | 0.940  |

Nasal obstruction (No nasal obstruction reference)

| Nasal obstruction | OR  | 95%CI |        |
|-------------------|-----|-------|--------|
|                   |     | Lower | Higher |
| Zhang 2020-severe | 0.3 | 0.2   | 0.7    |

Fatigue (No fatigue reference)

| Fatigue                   | OR    | 95%CI |        |
|---------------------------|-------|-------|--------|
|                           |       | Lower | Higher |
| Hu 2020- disease severity | 3.04  | 1.43  | 6.45   |
| Zhang 2020-severe         | 1.8   | 1.1   | 2.8    |
| Wang 2020-sever           | 1.809 | 0.435 | 7.528  |
| Zhou 2020-patients        | 0.82  | 0.63  | 1.07   |
| Zhou 2020-severe          | 1.639 | 0.701 | 3.830  |
| Shao 2020-severe          | 2.600 | 1.124 | 6.012  |

Gastrointestinal symptoms (No gastrointestinal symptoms reference)

| Gastrointestinal symptoms | OR    | 95%CI |        |
|---------------------------|-------|-------|--------|
|                           |       | Lower | Higher |
| Zhang 2020-severe         | 2.1   | 1.2   | 3.6    |
| Zhou 2020-patients        | 1.11  | 0.76  | 1.63   |
| Lian 2020-severe          | 4.580 | 1.677 | 12.511 |
| Zhou 2020-severe          | 1.593 | 0.451 | 5.624  |
| He 2020-severe            | 8.400 | 2.392 | 29.494 |
| Cheng 2020-critical       | 1.29  | 0.06  | 10.29  |

Poor sleep quality

| Poor sleep quality                               | Variable value    | OR    | 95%CI |        |
|--------------------------------------------------|-------------------|-------|-------|--------|
|                                                  |                   |       | Lower | Higher |
| Huang 2020-illness<br>(Recommended as reference) | Maybe appropriate | 6.729 | 2.138 | 21.181 |
|                                                  | Lack of sleep     | 8.612 | 1.913 | 38.760 |
| Huang 2020-illness<br>(hour)                     |                   | 0.463 | 0.287 | 0.745  |

|                                              |  |      |      |      |
|----------------------------------------------|--|------|------|------|
| Gao 2020-severe<br>(good sleep<br>reference) |  | 1.75 | 1.16 | 2.66 |
|----------------------------------------------|--|------|------|------|

Headache (No headache reference)

| Headache           | OR    | 95%CI |        |
|--------------------|-------|-------|--------|
|                    |       | Lower | Higher |
| Zhang 2020-severe  | 2.0   | 1.1   | 3.6    |
| Wang 2020-sever    | 0.474 | 0.057 | 3.968  |
| Zhou 2020-patients | 0.94  | 0.69  | 1.29   |
| Zhou2020-severe    | 0.889 | 0.269 | 2.932  |

Wheeze (No Wheeze)

| Wheeze           | OR    | 95%CI |        |
|------------------|-------|-------|--------|
|                  |       | Lower | Higher |
| Zhou 2020-severe | 1.167 | 0.413 | 3.295  |

Anorexia

| Anorexia         | OR    | 95%CI |        |
|------------------|-------|-------|--------|
|                  |       | Lower | Higher |
| Zhou 2020-severe | 4.500 | 1.742 | 11.622 |
| He 2020-severe   | 2.682 | 0.991 | 7.258  |

Muscle or joint pain (No Muscle or joint pain reference)

| Muscle or joint pain | OR    | 95%CI |        |
|----------------------|-------|-------|--------|
|                      |       | Lower | Higher |
| Zhou 2020-patients   | 0.77  | 0.53  | 1.12   |
| Lian 2020-severe     | 5.717 | 2.284 | 14.307 |
| Zhou 2020-severe     | 0.764 | 0.278 | 2.100  |
| Zhang 2020-severe    | 2.6   | 1.5   | 4.5    |

Dyspnea (No dyspnea reference)

| Dyspnea                      | OR     | 95%CI  |         |
|------------------------------|--------|--------|---------|
|                              |        | Lower  | Higher  |
| Zhou 2020-patients           | 0.84   | 0.47   | 1.49    |
| Hu 2020- disease severity    | 12.57  | 5.64   | 28.02   |
| Zhao2020-severe              | 1.385  | 0.254  | 7.556   |
| Cheng 2020-critical          | 40.56  | 16.19  | 117.96  |
| Shao 2020-severe             | 153.00 | 31.399 | 745.529 |
| Liu 2020-disease progression | 8.021  | 2.022  | 31.821  |
| Xu 2020-severity             | 3.112  | 2.148  | 4.507   |
| Hu 2020- disease severity    | 12.57  | 5.64   | 28.02   |
| Wei 2020-severe              | 6.910  | 2.837  | 16.831  |

Clear Epidemiological contact history (Unclear epidemiological contact history reference)

| Clear Epidemiological<br>contact history | OR | 95%CI |        |
|------------------------------------------|----|-------|--------|
|                                          |    | Lower | Higher |

|                    |      |      |      |
|--------------------|------|------|------|
| Zhou 2020-patients | 0.38 | 0.34 | 0.43 |
|--------------------|------|------|------|

Clear family-confirmed patient contact history (Unclear family-confirmed patient contact history reference)

| Clear family-confirmed patient contact history | OR    | 95%CI |        |
|------------------------------------------------|-------|-------|--------|
|                                                |       | Lower | Higher |
| Zhou 2020-patients                             | 0.56  | 0.49  | 0.63   |
| Bi 2020-severe                                 | 15.10 | 3.69  | 61.69  |

Clear Non-family-confirmed patient contact history (Unclear non-family-confirmed patient contact history reference)

| Clear Non-family-confirmed patient contact history | OR   | 95%CI |        |
|----------------------------------------------------|------|-------|--------|
|                                                    |      | Lower | Higher |
| Zhou 2020-patients                                 | 0.26 | 0.22  | 0.31   |

Clear travel-confirmed patient contact history (Unclear travel-confirmed patient contact history reference)

| Clear travel –confirmed patient contact history | OR   | 95%CI |        |
|-------------------------------------------------|------|-------|--------|
|                                                 |      | Lower | Higher |
| Bi 2020-severe                                  | 9.13 | 1.85  | 45.08  |

Clear meal-confirmed patient contact history (Unclear meal-confirmed patient contact history reference)

| Clear meal-confirmed patient contact history | OR    | 95%CI |        |
|----------------------------------------------|-------|-------|--------|
|                                              |       | Lower | Higher |
| Bi 2020-severe                               | 23.01 | 2.51  | 211.2  |

Contact frequency

| Contact frequency                   | Variable value | OR      | 95%CI |        |
|-------------------------------------|----------------|---------|-------|--------|
|                                     |                |         | Lower | Higher |
| Bi 2020-severe (moderate reference) | Rare           | <0.0001 | 0     | inf    |
|                                     | often          | 8.8     | 2.58  | 30.06  |

CRP

| CRP                                            | Variable value | OR    | 95%CI |        |
|------------------------------------------------|----------------|-------|-------|--------|
|                                                |                |       | Lower | Higher |
| Xu 2020-severity (<5 mg/L reference =          | >100           | 6.126 | 3.400 | 11.039 |
|                                                | 5–100          | 1.722 | 1.053 | 2.816  |
| Hu 2020- disease severity (≤10 mg/L reference) |                | 3.28  | 1.35  | 8.01   |
| Zhou 2020-severe (mg/L)                        |                | 1.199 | 1.046 | 1.375  |
| He 2020-severe (≤10 mg/L reference)            |                | 7.596 | 2.995 | 19.264 |
| Wei 2020-severe (mg/L)                         |                | 1.019 | 1.008 | 1.030  |

|                                                    |  |       |       |         |
|----------------------------------------------------|--|-------|-------|---------|
| Cheng 2020-critical (mg/L)                         |  | 2.02  | 1.04  | 4.09dey |
| Shao 2020-severe (mg/L)                            |  | 1.031 | 1.014 | 1.049   |
| Wang 2020-progression                              |  | 1.04  | 1.02  | 1.05    |
| Liu 2020-disease progression (≤8.2 mg/L reference) |  | 5.988 | 1.179 | 30.300  |
| Sun 2020-disease severity (mg/L)                   |  | 1.073 | 1.013 | 1.136   |
| Liu 2020-severe (mg/L)                             |  | 1.02  | 1.01  | 1.02    |
| Lian 2020-severe (mg/L)                            |  | 1.016 | 1.003 | 1.029   |

Early administration Preadmission drugs of antiviral (No early administration of antiviral)

| Early administration of antiviral | OR    | 95%CI |        |
|-----------------------------------|-------|-------|--------|
|                                   |       | Lower | Higher |
| Xu 2020-severity                  | 1.592 | 1.138 | 2.227  |

Interval between illness onset and diagnosis (days)

| Interval between illness onset and diagnosis | OR    | 95%CI |        |
|----------------------------------------------|-------|-------|--------|
|                                              |       | Lower | Higher |
| Xu 2020-severity                             | 1.082 | 1.048 | 1.116  |

Days from diseases onset to improvement (days)

| Days from diseases onset to improvement (days) | OR    | 95%CI |        |
|------------------------------------------------|-------|-------|--------|
|                                                |       | Lower | Higher |
| Shao 2020-severe                               | 1.100 | 1.035 | 1.169  |

Lactate dehydrogenase (U/L)

| Lactate dehydrogenase (U/L)                | Variable value | OR   | 95%CI |        |
|--------------------------------------------|----------------|------|-------|--------|
|                                            |                |      | Lower | Higher |
| Cheng 2020-critical (91-230 U/L reference) | <91            | 0.34 | 0.012 | 1.84   |
|                                            | >230           | 2.04 | 0.98  | 4.22   |
| Li 2020-severe (≤445 U/L reference)        | 4.42           | 2.57 | 7.60  |        |

Interval between illness onset and admission (Days)

| Interval between illness onset and admission | OR    | 95%CI |        |
|----------------------------------------------|-------|-------|--------|
|                                              |       | Lower | Higher |
| Xu 2020-severity                             | 1.116 | 1.083 | 1.150  |
| Zhang 2020-severe                            | 1.1   | 1.0   | 1.2    |

Hang hygiene

| Hang hygiene | OR | 95%CI |
|--------------|----|-------|
|--------------|----|-------|

|                 |      |       |        |
|-----------------|------|-------|--------|
|                 |      | Lower | Higher |
| Gao 2020-severe | 0.38 | 0.23  | 0.63   |

#### Living alone

|                 |      |       |        |
|-----------------|------|-------|--------|
| Living alone    | OR   | 95%CI |        |
|                 |      | Lower | Higher |
| Gao 2020-severe | 0.89 | 0.39  | 2.04   |

#### Spicy food intake > 3 times a week

|                                    |      |       |        |
|------------------------------------|------|-------|--------|
| Spicy food intake > 3 times a week | OR   | 95%CI |        |
|                                    |      | Lower | Higher |
| Gao 2020-severe                    | 1.62 | 0.95  | 2.76   |

#### Playing Mahjong > once a week

|                               |      |       |        |
|-------------------------------|------|-------|--------|
| Playing Mahjong > once a week | OR   | 95%CI |        |
|                               |      | Lower | Higher |
| Gao 2020-severe               | 1.00 | 0.60  | 1.66   |

#### Cooking by oneself > 5 times a week

|                                     |      |       |        |
|-------------------------------------|------|-------|--------|
| Cooking by oneself > 5 times a week | OR   | 95%CI |        |
|                                     |      | Lower | Higher |
| Gao 2020-severe                     | 0.65 | 0.39  | 1.09   |

#### Alopecia

|                 |      |       |        |
|-----------------|------|-------|--------|
| Alopecia        | OR   | 95%CI |        |
|                 |      | Lower | Higher |
| Gao 2020-severe | 3.63 | 1.90  | 6.92   |

#### Constipation

|                 |      |       |        |
|-----------------|------|-------|--------|
| Constipation    | OR   | 95%CI |        |
|                 |      | Lower | Higher |
| Gao 2020-severe | 1.07 | 0.57  | 2.02   |

#### Common cold >3 times a year

|                              |      |       |        |
|------------------------------|------|-------|--------|
| Common cold > 3 times a year | OR   | 95%CI |        |
|                              |      | Lower | Higher |
| Gao 2020-severe              | 1.06 | 0.46  | 2.47   |

#### Exposure history (No exposure history reference)

| Exposure history          | OR    | 95%CI |        |
|---------------------------|-------|-------|--------|
|                           |       | Lower | Higher |
| Hu 2020- disease severity | 0.91  | 0.39  | 2.14   |
| Zhang 2020-severe         | 1.1   | 0.8   | 1.6    |
| Wang 2020-severe          | 4.260 | 1.517 | 11.962 |
| Hu 2020-COVID19           | 5.01  | 0.63  | 39.92  |
| He 2020-severe            | 2.607 | 1.174 | 5.791  |
| Wang 2020-severe          | 0.249 | 0.14  | 0.44   |

#### Incubation period

| Incubation period (days) | OR   | 95%CI |        |
|--------------------------|------|-------|--------|
|                          |      | Lower | Higher |
| Gao 2020-severe          | 1.01 | 0.95  | 1.07   |

Anti-viral drug (No Anti-viral drug reference)

| Anti-viral drug      | OR    | 95%CI |        |
|----------------------|-------|-------|--------|
|                      |       | Lower | Higher |
| Cen 2020-progression | 4.292 | 2.695 | 6.837  |

Duration of anti-viral therapy

| Duration of anti-viral therapy | OR    | 95%CI |        |
|--------------------------------|-------|-------|--------|
|                                |       | Lower | Higher |
| Cen 2020-progression           | 4.689 | 3.463 | 6.349  |

Respiratory rate

| Respiratory rate                                         | OR    | 95%CI |        |
|----------------------------------------------------------|-------|-------|--------|
|                                                          |       | Lower | Higher |
| Liu 2020-disease progression (≤20 breaths/min reference) | 3.952 | 0.473 | 33.333 |
| He 2020-severe (≤24 breaths/min reference)               | 9.769 | 2.307 | 41.376 |
| Cheng 2020-critical                                      | 15.63 | 6.34  | 42.77  |
| Shao 2020-severe                                         | 1.412 | 1.237 | 1.611  |
| Wang2020-progression                                     | 1.06  | 0.92  | 1.21   |

Preadmission drugs

| Preadmission drugs | OR    | 95%CI |        |
|--------------------|-------|-------|--------|
|                    |       | Lower | Higher |
| Zhou 2020-severe   | 0.651 | 0.267 | 1.589  |

Blood oxygen saturation

| Blood oxygen saturation                          | OR    | 95%CI |        |
|--------------------------------------------------|-------|-------|--------|
|                                                  |       | Lower | Higher |
| Liu 2020-disease progression (>93% as reference) | 2.259 | 0.394 | 12.958 |

Heart rate

| Heart rate                                               | OR    | 95%CI |        |
|----------------------------------------------------------|-------|-------|--------|
|                                                          |       | Lower | Higher |
| Liu 2020-disease progression (<100 beats/min reference = | 2.259 | 0.394 | 12.958 |

Severe illness (no severe illness reference)

| Severe illness               | OR    | 95%CI |        |
|------------------------------|-------|-------|--------|
|                              |       | Lower | Higher |
| Liu 2020-disease progression | 4.651 | 0.930 | 23.250 |

D-dimer

| D-dimer                                              | Variable value | OR    | 95%CI |        |
|------------------------------------------------------|----------------|-------|-------|--------|
|                                                      |                |       | Lower | Higher |
| Liu 2020-disease progression<br>(≤1 mg/ML reference) |                | 1.799 | 0.363 | 8.928  |
| Xu 2020-severity<br>(≤0.5 mg/L reference )           |                | 3.548 | 2.414 | 5.214  |
| Sun 2020- disease severity<br>(mg/L)                 |                | 5.313 | 0.325 | 86.816 |
| Hu 2020- disease severity<br>(≤0.5 mg/L reference)   |                | 2.69  | 1.23  | 5.90   |
| Liu 2020-severe<br>(mg/L)                            |                | 1.28  | 1.06  | 1.55   |
| Zhou 2020-severe<br>(mg/L)                           |                | 0.748 | 0.419 | 1.336  |
| He 2020-severe<br>(≤ 1000 mg/L)                      | > 1000         | 1.947 | 0.859 | 4.416  |
| Li 2020-severe<br>(≤1 mg/ML reference)               |                | 2.18  | 1.42  | 3.34   |
| Cheng 2020-critical<br>(mg/L)                        |                | 2.52  | 1.29  | 4.96   |
| Wang 2020-PROGRESSION                                |                | 1.78  | 1.02  | 3.09   |

Prothrombin time (PT)

| Prothrombin time (PT)         | OR    | 95%CI |        |
|-------------------------------|-------|-------|--------|
|                               |       | Lower | Higher |
| Zhou 2020-severe<br>(seconds) | 0.871 | 0.700 | 1.085  |

International normalized ratio (INR)

| International normalized ratio (INR) | OR    | 95%CI |        |
|--------------------------------------|-------|-------|--------|
|                                      |       | Lower | Higher |
| Zhou 2020-severe<br>(%)              | 0.468 | 0.031 | 7.142  |

Ferritin

| Ferritin             | OR   | 95%CI |        |
|----------------------|------|-------|--------|
|                      |      | Lower | Higher |
| Gao 2020-progression | 1.00 | 1.00  | 1.001  |

#### Albumin

| Albumin                                          | OR     | 95%CI |        |
|--------------------------------------------------|--------|-------|--------|
|                                                  |        | Lower | Higher |
| Liu 2020-disease progression (≥40 g/L reference) | 12.536 | 2.409 | 65.233 |
| Xu 2020-severity (≥40 g/L reference)             | 5.734  | 3.532 | 9.306  |
| Hu 2020- disease severity (≥35 g/L reference)    | 9.86   | 4.25  | 22.89  |
| Liu 2020-sever (g/L)                             | 0.91   | 0.87  | 0.96   |
| Lian 2020-severe (g/L)                           | 0.850  | 0.774 | 0.933  |
| Zhou2020-severe (g/L)                            | 0.905  | 0.820 | 0.998  |
| Wei 2020-severe (g/L)                            | 0.789  | 0.697 | 0.894  |
| Shao 2020-severe (g/L)                           | 0.829  | 0.774 | 0.887  |

#### Quadrant score

| Quadrant score       | OR   | 95%CI |        |
|----------------------|------|-------|--------|
|                      |      | Lower | Higher |
| Liu 2020-sever (1–4) | 2.28 | 1.71  | 3.05   |
|                      |      |       |        |

#### RBC (red blood cell)

| RBC (red blood cell) ×10 <sup>12</sup> /L | OR    | 95%CI |        |
|-------------------------------------------|-------|-------|--------|
|                                           |       | Lower | Higher |
| Zhou2020-severe                           | 1.661 | 0.750 | 3.681  |
| Shao 2020-severe                          | 0.506 | 0.337 | 0.759  |

#### WBC

| WBC                                                            | Variable value | OR    | 95%CI |        |
|----------------------------------------------------------------|----------------|-------|-------|--------|
|                                                                |                |       | Lower | Higher |
| Liu 2020-disease progression (<4×10 <sup>9</sup> /L reference) |                | 1.488 | 0.163 | 2.770  |
| Xu 2020-severity (<4×10 <sup>9</sup> /L reference)             | 4–10           | 1.204 | 0.735 | 1.973  |
|                                                                | >10            | 3.416 | 1.834 | 6.360  |

|                                                                       |  |       |       |       |
|-----------------------------------------------------------------------|--|-------|-------|-------|
| Hu 2020- disease severity ( $\leq 10 \times 10^9/\text{L}$ reference) |  | 10.75 | 2.56  | 42.21 |
| Zhou 2020-severe ( $10^9/\text{L}$ )                                  |  | 0.829 | 0.653 | 1.052 |

#### Haemoglobin

| Haemoglobin                                          | OR    | 95%CI |        |
|------------------------------------------------------|-------|-------|--------|
|                                                      |       | Lower | Higher |
| Xu 2020-severity ( $\geq 130 \text{ g/l}$ reference) | 1.545 | 1.104 | 2.162  |

#### Blood urea nitrogen (mmol/l)

| Blood urea nitrogen                        | OR    | 95%CI |        |
|--------------------------------------------|-------|-------|--------|
|                                            |       | Lower | Higher |
| Xu 2020-severity ( $\leq 9.5$ reference)   | 3.257 | 1.811 | 5.860  |
| Zhou 2020-severity ( $\leq 9.5$ reference) | 1.020 | 0.954 | 1.092  |

#### Lymphocytes

| Lymphocytes                                                               | Variable value | OR    | 95%CI |        |
|---------------------------------------------------------------------------|----------------|-------|-------|--------|
|                                                                           |                |       | Lower | Higher |
| Liu 2020-disease progression ( $\geq 1.1 \times 10^9/\text{L}$ reference) |                | 1.600 | 0.167 | 2.336  |
| Xu 2020-severity ( $\geq 1.1 \times 10^9/\text{L}$ reference)             | <0.5           | 2.684 | 1.508 | 4.776  |
|                                                                           | 0.5–1.1        | 1.567 | 1.096 | 2.239  |
| Sun 2020-diseases severity ( $10^9/\text{L}$ )                            |                | 0.989 | 0.979 | 1.000  |
| Hu 2020- disease severity ( $\geq 0.8 \times 10^9/\text{L}$ reference)    |                | 4.30  | 0.25  | 9.02   |
| Liu 2020-sever ( $10^9/\text{L}$ )                                        |                | 0.03  | 0.01  | 0.08   |
| Lian 2020-severe ( $10^9/\text{L}$ )                                      |                | 0.236 | 0.087 | 0.641  |
| Zhou 2020-severe ( $10^9/\text{L}$ )                                      |                | 0.084 | 0.025 | 0.280  |
| He 2020-severe ( $\geq 1.1 \times 10^9/\text{L}$ reference)               |                | 0.263 | 0.121 | 0.573  |
| Wei 2020-severe ( $10^9/\text{L}$ )                                       |                | 0.284 | 0.099 | 0.815  |
| Cheng 2020-critical ( $1.1\text{--}3.2 \times 10^9/\text{L}$ reference)   | <1.1           | 3.68  | 1.83  | 7.94   |
|                                                                           | >3.2           | 4.18  | 0.19  | 42.28  |
| Wang 2020-progression                                                     |                | 0.996 | 0.994 | 0.997  |

#### Hypersensitive troponin

| Hypersensitive troponin                            | OR    | 95%CI |        |
|----------------------------------------------------|-------|-------|--------|
|                                                    |       | Lower | Higher |
| Hu 2020-outcomes<br>( $\leq 0.04$ gp/MI reference) | 4.388 | 1.261 | 15.271 |
| Wang 2020-progression                              | 0.92  | 0.60  | 1.51   |

#### Hemoglobin

| Hemoglobin                          | OR    | 95%CI |        |
|-------------------------------------|-------|-------|--------|
|                                     |       | Lower | Higher |
| He 2020-severe<br>(g/L reference)   | 0.966 | 0.946 | 0.986  |
| Shao 2020-severe<br>(g/L reference) | 0.960 | 0.940 | 0.980  |

#### Neutrophils

| Neutrophils                                                        | Variable value | OR    | 95%CI |        |
|--------------------------------------------------------------------|----------------|-------|-------|--------|
|                                                                    |                |       | Lower | Higher |
| Liu 2020-disease progression<br>( $<1.8 \times 10^9$ /L reference) |                | 2.037 | 0.236 | 17.544 |
| Xu 2020-severity<br>( $<1.8 \times 10^9$ /L reference =            | $>6.3$         | 3.887 | 1.601 | 9.442  |
|                                                                    | 1.8–6.3        | 1.516 | 0.650 | 3.536  |
| Hu 2020- disease severity<br>( $10^9$ /L)                          |                | 1.30  | 1.06  | 1.59   |
| Zhou 2020-severe<br>( $10^9$ /L)                                   |                | 1.006 | 0.810 | 1.249  |
| Hu 2020-outcomes<br>( $\leq 75 \times 10^9$ /L)                    |                | 5.929 | 2.299 | 15.290 |
| Cheng 2020-critical<br>( $1.8-6.3 \times 10^9$ /L reference)       | $<1.8$         | 1.00  | 0.35  | 2.49   |
|                                                                    | $>6.3$         | 5.13  | 2.33  | 11.44  |
| Shao 2020-severe<br>( $10^9$ /L)                                   |                | 1.443 | 1.201 | 1.733  |

#### Platelets

| Platelets                                                              | Variable value | OR    | 95%CI |        |
|------------------------------------------------------------------------|----------------|-------|-------|--------|
|                                                                        |                |       | Lower | Higher |
| Liu 2020-disease progression<br>( $\geq 100 \times 10^9$ /L reference) |                | 2.259 | 0.394 | 12.958 |
| Xu 2020-severity<br>( $<125 \times 10^9$ /L reference =                | 125–350        | 1.370 | 0.802 | 2.341  |
|                                                                        | $>350$         | 3.666 | 1.612 | 8.335  |
| Liu 2020-sever<br>( $10^9$ /L)                                         |                | 0.99  | 0.98  | 0.99   |
| Zhou 2020-severe<br>( $10^9$ /L)                                       |                | 0.991 | 0.983 | 0.999  |

|                                                     |      |       |       |       |
|-----------------------------------------------------|------|-------|-------|-------|
| He 2020-severe<br>(10 <sup>9</sup> /L)              |      | 0.993 | 0.987 | 1.000 |
| Cheng 2020-critical<br>(125-130×10 <sup>9</sup> /L) | <125 | 1.18  | 0.49  | 2.62  |
|                                                     | >350 | 3.68  | 0.66  | 20.52 |

#### PT

| PT                                     | OR   | 95%CI |        |
|----------------------------------------|------|-------|--------|
|                                        |      | Lower | Higher |
| Hu 2020- disease severity<br>(seconds) | 1.32 | 1.02  | 1.72   |

#### Monocyte count

| Monocyte count                                      | Variable<br>value | OR   | 95%CI |        |
|-----------------------------------------------------|-------------------|------|-------|--------|
|                                                     |                   |      | Lower | Higher |
| Cheng 2020-critical<br>(0.1-0.6×10 <sup>9</sup> /L) | <0.1              | 3.69 | 0.14  | 94.79  |
|                                                     | >0.6              | 1.53 | 0.69  | 3.21   |

#### ALT

| ALT                                                    | OR    | 95%CI |        |
|--------------------------------------------------------|-------|-------|--------|
|                                                        |       | Lower | Higher |
| Liu 2020-disease<br>progression<br>(≤50 U/L reference) | 1.032 | 0.231 | 2.148  |
| Xu 2020-severity<br>(≤50 U/L reference)                | 3.783 | 2.593 | 5.521  |
| Hu 2020- disease severity<br>(≤40 U/L reference)       | 3.39  | 1.49  | 7.70   |
| Zhou 2020-severe<br>(≤50 U/L reference)                | 0.999 | 0.989 | 1.008  |
| He 2020-severe<br>(≤50 U/L reference)                  | 2.604 | 1.022 | 6.634  |
| Cheng 2020-critical<br>(U/L)                           | 2.30  | 1.09  | 4.70   |

#### AST

| AST<br>(>40 vs.)                                       | OR    | 95%CI |        |
|--------------------------------------------------------|-------|-------|--------|
|                                                        |       | Lower | Higher |
| Liu 2020-disease<br>progression<br>(≤40 U/L reference) | 2.088 | 0.443 | 9.901  |
| Xu 2020-severity<br>(≤40 U/L reference)                | 3.410 | 2.388 | 4.871  |
| Hu 2020- disease severity<br>(≤40 U/L reference)       | 3.32  | 1.38  | 7.99   |
| Zhou2020- severity<br>(≤40 U/L reference)              | 1.005 | 0.989 | 1.021  |

|                                               |       |       |       |
|-----------------------------------------------|-------|-------|-------|
| He 2020- severe<br>( $\leq 40$ U/L reference) | 3.545 | 1.425 | 8.823 |
| Cheng 2020-critical<br>(U/L)                  | 2.30  | 1.19  | 4.44  |

#### NLR

| NLR                                | Variable<br>value | OR   | 95%CI |        |
|------------------------------------|-------------------|------|-------|--------|
|                                    |                   |      | Lower | Higher |
| Cheng 2020-critical<br>(0.78-3.53) | $< 0.78$          | N/A  | N/A   | N/A    |
|                                    | $> 3.53$          | 3.73 | 1.96  | 7.32   |
| Wang 2020-<br>progression          |                   | 1.44 | 1.23  | 1.68   |

#### APTT(s)

| APTT                           | Variable<br>value | OR  | 95%CI |        |
|--------------------------------|-------------------|-----|-------|--------|
|                                |                   |     | Lower | Higher |
| Cheng 2020-critical<br>(21-37) | $< 0.78$          | N/A | N/A   | N/A    |

#### Creatinine

| Creatinine                                                        | Variable<br>value | OR    | 95%CI |        |
|-------------------------------------------------------------------|-------------------|-------|-------|--------|
|                                                                   |                   |       | Lower | Higher |
| Liu 2020-disease<br>progression<br>( $\leq 111$ mmol/L reference) |                   | 6.880 | 1.424 | 32.470 |
| Xu 2020-severity<br>( $\leq 111$ mmol/L reference)                |                   | 3.645 | 1.927 | 6.895  |
| Zhou 2020-severe<br>( $\leq 111$ mmol/L reference)                |                   | 1.003 | 0.997 | 1.010  |
| He 2020-severe<br>( $\leq 106$ mmol/L reference)                  |                   | 4.667 | 1.104 | 19.728 |
| Cheng 2020-critical<br>(44-112 mmol/L reference)                  | $< 44$            | 1.27  | 0.26  | 4.77   |
|                                                                   | $> 112$           | 2.95  | 0.79  | 11.09  |

#### Total bilirubin (mmol/l)

| Total bilirubin                                   | Variable<br>value | OR    | 95%CI |        |
|---------------------------------------------------|-------------------|-------|-------|--------|
|                                                   |                   |       | Lower | Higher |
| Xu 2020-severity<br>( $\leq 20.5$ mmol/l)         |                   | 0.547 | 0.277 | 1.079  |
| Zhou2020-severe<br>( $\leq 20.5$ mmol/l)          |                   | 1.027 | 0.940 | 1.123  |
| Cheng 2020-critical<br>(3-21 mmol/l<br>reference) | $< 5$             | N/A   | N/A   | N/A    |
|                                                   | $> 21$            | 5.60  | 2.40  | 13.50  |

#### Direct bilirubin (mmol/l)

| Direct bilirubin | OR | 95%CI |
|------------------|----|-------|
|------------------|----|-------|

|                                          |       | Lower | Higher |
|------------------------------------------|-------|-------|--------|
| Xu 2020-severity<br>( $\leq 8.6$ mmol/l) | 1.052 | 0.590 | 1.875  |
| Zhou2020-severe<br>( $\leq 8.6$ mmol/l)  | 1.168 | 0.921 | 1.480  |

#### Indirect bilirubin (mmol/l)

| indirect bilirubin           | OR    | 95%CI |        |
|------------------------------|-------|-------|--------|
|                              |       | Lower | Higher |
| Zhou2020-severe<br>(unknown) | 1.007 | 0.889 | 1.140  |

#### Urinary glucose (Negative reference)

| Urinary glucose  | OR    | 95%CI |        |
|------------------|-------|-------|--------|
|                  |       | Lower | Higher |
| Xu 2020-severity | 1.088 | 0.599 | 1.976  |

#### Urinary protein (Negative reference)

| Urinary protein<br>(positive) | OR    | 95%CI |        |
|-------------------------------|-------|-------|--------|
|                               |       | Lower | Higher |
| Xu 2020-severity              | 1.436 | 0.918 | 2.247  |

#### Total protein

| Total protein    | OR    | 95%CI |        |
|------------------|-------|-------|--------|
|                  |       | Lower | Higher |
| Shao 2020-severe | 0.926 | 0.889 | 0.964  |

#### Sodium

| Sodium                                             | OR    | 95%CI |        |
|----------------------------------------------------|-------|-------|--------|
|                                                    |       | Lower | Higher |
| Xu 2020-severity<br>( $\leq 147$ mmol/l reference) | 1.809 | 0.388 | 8.433  |

#### Potassium

| Potassium (mmol/l)                       | Variable<br>value | OR    | 95%CI |        |
|------------------------------------------|-------------------|-------|-------|--------|
|                                          |                   |       | Lower | Higher |
| Xu 2020-severity<br>( $< 3.5$ reference= | 3.5–5.3           | 2.847 | 1.459 | 5.557  |
|                                          | $> 5.3$           | 5.164 | 1.664 | 16.020 |
| Shao 2020-severe<br>(mmol/L)             |                   | 0.401 | 0.213 | 0.757  |

#### Calcium (mmol/l)

| Calcium                                   | OR    | 95%CI |        |
|-------------------------------------------|-------|-------|--------|
|                                           |       | Lower | Higher |
| Xu 2020-severity<br>( $< 2.55$ reference= | 1.279 | 0.525 | 3.120  |

#### LDH ( $\mu$ /l)

| LDH ( $\mu$ /l)                                          | OR    | 95%CI |        |
|----------------------------------------------------------|-------|-------|--------|
|                                                          |       | Lower | Higher |
| Xu 2020-severity<br>( $<245$ U/L reference=              | 3.062 | 2.114 | 4.434  |
| Hu 2020- disease severity<br>( $\leq 250$ U/L reference) | 6.75  | 2.8   | 16.28  |
| Wei 2020-severe<br>( $\leq 250$ U/L reference)           | 1.007 | 1.002 | 1.011  |
| Shao 2020-severe<br>(U/L)                                | 1.011 | 1.006 | 1.016  |

#### Erythrocyte sedimentation rate

| Erythrocyte sedimentation<br>rate                                | OR    | 95%CI |        |
|------------------------------------------------------------------|-------|-------|--------|
|                                                                  |       | Lower | Higher |
| Liu 2020-disease<br>progression<br>( $\leq 15$ mm/1 h reference) | 2.625 | 0.574 | 12.048 |

#### IL-6

| IL-6                  | OR    | 95%CI |        |
|-----------------------|-------|-------|--------|
|                       |       | Lower | Higher |
| IL-6                  | 1.019 | 1.006 | 1.031  |
| Wang 2020-progression | 1.05  | 1.03  | 1.07   |

#### White blood cell count

| White blood cell<br>count                                          | Variable<br>value | OR     | 95%CI |        |
|--------------------------------------------------------------------|-------------------|--------|-------|--------|
|                                                                    |                   |        | Lower | Higher |
| Hu 2020-outcomes<br>( $< 10 \times 10^9$ per L<br>reference=       |                   | 10.853 | 3.040 | 38.748 |
| He 2020-severe<br>( $4-10 \times 10^9$ per L<br>reference)         | $\leq 4$          | 0.910  | 0.325 | 2.543  |
|                                                                    | $\geq 10$         | 15.553 | 4.032 | 59.988 |
| Cheng 2020-critical<br>( $3.5-9.5 \times 10^9$ per L<br>referecne) | $< 3.5$           | 0.39   | 0.09  | 1.16   |
|                                                                    | $> 9.5$           | 7.94   | 3.19  | 21.188 |
| Wang 2020-<br>progression<br>( $10^9$ per L)                       |                   | 0.97   | 0.84  | 1.12   |

#### CD4/8 cell count

| CD4/8 cell count      | OR    | 95%CI |        |
|-----------------------|-------|-------|--------|
|                       |       | Lower | Higher |
| Wei 2020-severe       | 0.997 | 0.994 | 1.000  |
| Wang 2020-progression | 1.02  | 0.68  | 1.52   |

## TBIL

| TBIL                 | OR   | 95%CI |        |
|----------------------|------|-------|--------|
|                      |      | Lower | Higher |
| Wang 2020-progresion | 1.02 | 0.98  | 1.06   |

## Alp

| Alp                  | OR   | 95%CI |        |
|----------------------|------|-------|--------|
|                      |      | Lower | Higher |
| Wang 2020-progresion | 0.99 | 0.98  | 1.00   |

Creatine kinase ( $\mu$ /l)

| Creatine kinase                                            | OR    | 95%CI |        |
|------------------------------------------------------------|-------|-------|--------|
|                                                            |       | Lower | Higher |
| Xu 2020-severity ( $\leq 200$ $\mu$ /l reference)          | 1.811 | 1.211 | 2.708  |
| Hu 2020- disease severity ( $\leq 200$ $\mu$ /l reference) | 4.42  | 1.32  | 14.93  |
| Zhou 2020-severe ( $\leq 200$ $\mu$ /l reference)          | 1.002 | 1.000 | 1.004  |
| He 2020-severe ( $\leq 310$ $\mu$ /l reference)            | 9.107 | 1.234 | 67.188 |
| Cheng 2020-cirital ( $\mu$ /l)                             | 1.77  | 0.82  | 3.72   |

## BUN

| BUN                                            | Variable value | OR    | 95%CI |        |
|------------------------------------------------|----------------|-------|-------|--------|
|                                                |                |       | Lower | Higher |
| Cheng 2020-critical (2.5-7.1 mmol/L reference) | <2.5           | 0.67  | 0.10  | 2.76   |
|                                                | >7.1           | 18.16 | 4.68  | 120.23 |

CK-MB ( $\mu$ /l)

| CK-MB                                                     | OR    | 95%CI |        |
|-----------------------------------------------------------|-------|-------|--------|
|                                                           |       | Lower | Higher |
| Xu 2020-severity ( $\leq 24$ $\mu$ /l reference)          | 0.650 | 0.341 | 1.239  |
| Hu 2020- disease severity ( $\leq 23$ $\mu$ /l reference) | 4.23  | 1.39  | 12.87  |
| Zhou 2020-severe ( $\leq 24$ $\mu$ /l reference)          | 1.010 | 0.928 | 1.101  |

## Myohaemoglobin

| Myohaemoglobin                                  | OR    | 95%CI |        |
|-------------------------------------------------|-------|-------|--------|
|                                                 |       | Lower | Higher |
| Xu 2020-severity ( $\leq 48.8$ ng/ml reference) | 6.888 | 4.770 | 9.945  |

#### Myoglobin (μg/L)

| Myoglobin (μg/L)                         | OR     | 95%CI |         |
|------------------------------------------|--------|-------|---------|
|                                          |        | Lower | Higher  |
| He 2020-severe<br>(≤ 106 μg/L reference) | 33.682 | 6.413 | 176.905 |

#### cTnI (ng/ml)

| cTnI (ng/ml)                                | OR     | 95%CI |        |
|---------------------------------------------|--------|-------|--------|
|                                             |        | Lower | Higher |
| Xu 2020-severity<br>(≤0.04 ng/ml reference) | 13.083 | 4.770 | 9.945  |
| He 2020-severity<br>(≤0.04 ng/ml reference) | 12.231 | 4.14  | 36.131 |

#### PCT (Procalcitonin)

| PCT (μ/l)                                                 | OR      | 95%CI |          |
|-----------------------------------------------------------|---------|-------|----------|
|                                                           |         | Lower | Higher   |
| Xu 2020-severity<br>(≤0.05μ/l reference)                  | 13.083  | 4.770 | 9.945    |
| Liu 2020-disease<br>progression<br>(≤0.5 ng/ml reference) | 3.831   | 0.551 | 27.027   |
| He 2020-SEVERE<br>(≤0.5 ng/ml reference)                  | 5.333   | 1.572 | 18.098   |
| Cheng 2020-critical<br>(ng/ml)                            | 4.40    | 1.77  | 13.36    |
| Shao 2020-severe<br>(ng/ml)                               | 123.157 | 1.944 | 7800.828 |
| Wang 2020-progression<br>(ng/ml)                          | 0.90    | 0.32  | 2.51     |

#### ESR

| ESR                                       | OR    | 95%CI |        |
|-------------------------------------------|-------|-------|--------|
|                                           |       | Lower | Higher |
| Xu 2020-severity<br>(>15 mm/h reference ) | 1.879 | 1.084 | 3.258  |
| Cheng 2020-critical<br>(mm/h)             | 2.18  | 1.05  | 4.54   |
| WANG 2020-progression                     | 1.02  | 1.00  | 1.03   |

#### BNP

| BNP                              | OR    | 95%CI |        |
|----------------------------------|-------|-------|--------|
|                                  |       | Lower | Higher |
| Xu 2020-severity<br>(≤250 ng/ml) | 3.900 | 2.479 | 6.136  |
| He 2020-severe                   | 1.022 | 1.005 | 1.040  |

|         |  |  |  |
|---------|--|--|--|
| (ng/ml) |  |  |  |
|---------|--|--|--|

#### Fibrinogen

| Fibrinogen                              | Variable value | OR    | 95%CI |        |
|-----------------------------------------|----------------|-------|-------|--------|
|                                         |                |       | Lower | Higher |
| Xu 2020-severity (≤4 g/l reference)     |                | 1.682 | 1.126 | 2.513  |
| Liu 2020-sever (g/L)                    |                | 1.87  | 1.50  | 2.32   |
| Zhou 2020-sever (g/L)                   |                | 2.832 | 1.438 | 5.578  |
| Wei 2020-severe (g/L)                   |                | 1.669 | 1.190 | 2.341  |
| Cheng 2020-critical (2-4 g/L reference) | <2             | N/A   | N/A   | N/A    |
|                                         | >4             | 2.90  | 1.46  | 5.77   |

#### Partial pressure of oxygen

| Partial pressure of oxygen                    | OR    | 95%CI |        |
|-----------------------------------------------|-------|-------|--------|
|                                               |       | Lower | Higher |
| Liu 2020-disease progression (≥60% reference) | 1.742 | 0.167 | 3.312  |

#### Lung imaging features

##### Bilateral lungs involved (No bilateral lungs involved)

| Bilateral lungs involved  | OR    | 95%CI |        |
|---------------------------|-------|-------|--------|
|                           |       | Lower | Higher |
| Xu 2020-severity          | 3.618 | 1.519 | 8.616  |
| Hu 2020- disease severity | 2.27  | 0.64  | 8.01   |
| Zhou 2020-severe          | 1.524 | 0.586 | 3.961  |

##### Consolidation (No Consolidation)

| Consolidation    | OR    | 95%CI |        |
|------------------|-------|-------|--------|
|                  |       | Lower | Higher |
| Xu 2020-severity | 0.319 | 0.201 | 0.704  |

##### Ground-glass opacity (No ground-glass opacity reference)

| Ground-glass opacity | OR    | 95%CI |        |
|----------------------|-------|-------|--------|
|                      |       | Lower | Higher |
| Xu 2020-severity     | 1.080 | 0.409 | 2.855  |

##### Linear opacity (No Linear opacity)

| Linear opacity   | OR    | 95%CI |        |
|------------------|-------|-------|--------|
|                  |       | Lower | Higher |
| Xu 2020-severity | 1.685 | 1.015 | 2.798  |

##### Pulmonary opacity (No Pulmonary opacity)

| Pulmonary opacity | OR | 95%CI |        |
|-------------------|----|-------|--------|
|                   |    | Lower | Higher |

|                            |      |      |      |
|----------------------------|------|------|------|
| Liu 2020-sever<br>(Per 5%) | 1.38 | 1.28 | 1.49 |
|----------------------------|------|------|------|

Linear opacity (No Linear opacity)

| Linear opacity   | OR    | 95%CI |        |
|------------------|-------|-------|--------|
|                  |       | Lower | Higher |
| Xu 2020-severity | 1.149 | 0.439 | 3.008  |

Pleural thickening (No Pleural thickening)

| Pleural thickening | OR    | 95%CI |        |
|--------------------|-------|-------|--------|
|                    |       | Lower | Higher |
| Xu 2020-severity   | 0.600 | 0.375 | 0.961  |

Lung lobes involved (No Lung lobes involved)

| Lung lobes involved | OR    | 95%CI |        |
|---------------------|-------|-------|--------|
|                     |       | Lower | Higher |
| Xu 2020-severity    | 1.531 | 1.270 | 1.847  |
