# Supplementary material
Source: MDPI journal article supplement (https://www.mdpi.com/2071-1050/13/9/5305)
Supplement: s1 [file s1]

Table S3 The Extracted determinants

| Category                 | Determinants                                                                                                                                                                                                                                                                                                                                                                                                                                                                                                                                                                                                                                                                                                                                                                                                                                                                                                                                                                                                                                                                                                                                                                                                                                   |
|--------------------------|------------------------------------------------------------------------------------------------------------------------------------------------------------------------------------------------------------------------------------------------------------------------------------------------------------------------------------------------------------------------------------------------------------------------------------------------------------------------------------------------------------------------------------------------------------------------------------------------------------------------------------------------------------------------------------------------------------------------------------------------------------------------------------------------------------------------------------------------------------------------------------------------------------------------------------------------------------------------------------------------------------------------------------------------------------------------------------------------------------------------------------------------------------------------------------------------------------------------------------------------|
| 1-behaviour              | <b>1.1-age 1.2-gender 1.3-history of smoking</b> 1.4-secondhand smoking exposure 1.5-alcohol intake 1.6-fruits intake 1.7-regular diets 1.8-BMI 1.9-regular exercise 1.10-lunch break 1.11-family cluster 1.12-cluster case 1.13-city of residence at the time of diagnosis 1.14-type of contact 1.15-MET(metabolic equivalent of task) 1.16-residence 1.17-generation of COVID-19 transmission 1.18-infectors' contacts 1.19-hypnotics 1.20-diagnosis at critical status 1.21- Score on hand hygiene 1.22-Hand hygiene 1.23- Living alone 1.24-spicy food intake 1.25-playing Mahjong 1.26-cooking by oneself 1.27-living with children 1.28- Living with families with chronic diseases                                                                                                                                                                                                                                                                                                                                                                                                                                                                                                                                                      |
| 2-symptoms               | 2.1-symptomatic 2.2-poor appetite <b>2.3-fever</b> 2.4-duration of fever 2.5-cold 2.6-chest congestion <b>2.7-cough 2.8-sputum production</b> 2.9-single onset 2.10-temperature 2.11-maximum body temperature at admission 2.12-chest pain <b>2.13-Dyspnea</b> 2.14-SOFA score 2.15-hemoptysis <b>2.16-sore throat</b> 2.17-nasal obstruction <b>2.18-muscle or joint pain 2.19-fatigue</b> 2.20-poor sleep quality <b>2.21-headache</b> 2.22-wheeze 2.23-anorexia 2.24-alopecia 2.25-constipation <b>2.26-respiratory rate</b> 2.27-heart rate 2.28-expectoration                                                                                                                                                                                                                                                                                                                                                                                                                                                                                                                                                                                                                                                                             |
| 3-comorbidities          | <b>3.1-any other coexisting disorder 3.2-hypertension 3.3-cardiovascular disease</b> 3.4-hepatitis B infection <b>3.5-diabetes 3.6-cancer 3.7-COPD (chronic obstructive pulmonary disorder)</b> 3.8-chronic liver disease 3.9-chronic kidney disease 3.10-chronic renal disease 3.11-coronary artery disease 3.12-bilateral pneumonia <b>3.13-gastrointestinal diseases</b>                                                                                                                                                                                                                                                                                                                                                                                                                                                                                                                                                                                                                                                                                                                                                                                                                                                                    |
| 4-laboratory results     | 4.1-fingertip oxygen saturation 4.2-lactate dehydrogenase <b>4.3-CRP(C reactive protein)</b> 4.4-immunoglobulin use 4.5-blood oxygen saturation 4.6- leucocyte count <b>4.7-D-dimer</b> 4.8-prothrombin time (PT) 4.9-international normalized ratio (INR) 4.10-ferritin <b>4.11-albumin</b> 4.12-quadrant score 4.13-RBC(red blood cell) 4.14- WBC 4.15-haemoglobin 4.16-blood urea nitrogen(mmol/l) <b>4.17-lymphocytes</b> 4.18-hypersensitive troponin 4.19-hemoglobin <b>4.20-neutrophils 4.21-platelets</b> 4.22-PT 4.23-monocyte count <b>4.24-ALT 4.25-AST</b> 4.26-NLR 4.27-APTT(s) <b>4.28-creatinine</b> 4.29-total bilirubin (mmol/l) 4.30-direct bilirubin (mmol/l) 4.31-indirect bilirubin (mmol/l) 4.32-urinary glucose 4.33-urinary protein 4.34-total protein 4.35-sodium 4.36-potassium 4.37-calcium (mmol/l) <b>4.38-LDH (μ/l)</b> 4.39-erythrocyte sedimentation rate 4.40-IL-6 4.41-white blood cell count 4.42-CD4/8 cell count 4.43-TBIL 4.44-Alp <b>4.45-creatine kinase (μ/l)</b> 4.46-BUN <b>4.47-CK-MB (μ/l)</b> 4.48-myohaemoglobin 4.49-myoglobin (μg/L) 4.50-cTnI (ng/ml) <b>4.51-PCT (μ/l) (procalcitonin)</b> 4.52-ESR 4.53-BNP <b>4.54-fibrinogen</b> 4.55-partial pressure of oxygen 4.56- incubation period |
| 5- Radiographic findings | 5.1-radiology manifestation <b>5.2-bilateral lungs involved</b> 5.3-consolidation 5.4-ground-glass opacity 5.5-linear opacity 5.6-pulmonary opacity 5.7-linear opacity 5.8-pleural thickening 5.9-lung lobes involved                                                                                                                                                                                                                                                                                                                                                                                                                                                                                                                                                                                                                                                                                                                                                                                                                                                                                                                                                                                                                          |
| 6.Exposure               | 6.1-clear Epidemiological contact history 6.2- clear family-confirmed patient contact history 6.3-clear Non-family-confirmed patient contact history 6.4-clear travel-confirmed patient contact history 6.5-clear meal-confirmed patient contact history 6.6-contact frequency <b>6.7-exposure history</b>                                                                                                                                                                                                                                                                                                                                                                                                                                                                                                                                                                                                                                                                                                                                                                                                                                                                                                                                     |
| 7.Others                 | 7.1-anti-viral drug 7.2-early administration of antiviral 7.3-duration of anti-viral therapy 7.4-preadmission drugs 7.5-surveillance method 7.6-interval between illness onset and diagnosis 7.7-days from diseases onset to improvement                                                                                                                                                                                                                                                                                                                                                                                                                                                                                                                                                                                                                                                                                                                                                                                                                                                                                                                                                                                                       |

The bold determinants were included in meta-analysis.
