# Supplementary material
Source: MDPI journal article supplement (https://www.mdpi.com/2071-1050/13/9/5305)
Supplement: s1 [file s1]

## Table S1 The Search Strategy

### Keyword (for other researchers to replicate study)

#### English keyword:

China/Chinese

COVID-19/ coronavirus disease 2019/ SARS-CoV-2

Severity/ progression/critical

Determinants/factors/indicators

#### Chinese keyword:

中国的

新冠病毒、新冠疫情、新型冠状病毒

进展、严重

影响因素

### Search strategy (for other researchers to replicate study)

#### Database 1: CAJD (CNKI):

TKA=('新冠病毒'+ '新冠疫情'+ '新型冠状病毒') AND TKA=('进展'+ '严重') AND TKA=('影响因素')

**Database 2: CSPD (WAN FANG Data):** (主题:(新冠病毒) or 主题:(新冠疫情) or 主题:(新型冠状病毒)) and (主题:(进展) or 主题:(严重)) and 主题:(影响因素)

#### Database3: PubMed (NCBI)

| Sequence | Query                                                                                        |         |
|----------|----------------------------------------------------------------------------------------------|---------|
| #1       | Search: (China[Title/Abstract]) OR China[MeSH Terms]                                         | 290,096 |
| #2       | Search: (Chinese[Title/Abstract]) OR Chinese[MeSH Terms]                                     | 265,473 |
| #3       | Search: (COVID-19 [Title/Abstract]) OR COVID-19 [MeSH Terms]                                 | 83,434  |
| #4       | Search: (Coronavirus disease 2019 [Title/Abstract]) OR Coronavirus disease 2019 [MeSH Terms] | 56,140  |
| #5       | Search: (SARS-CoV-2 [Title/Abstract]) OR SARS-CoV-2 [MeSH Terms]                             | 52,146  |
| #6       | Search: (Severity [Title/Abstract]) OR Severity [MeSH Terms (Term not found)]                | 452,666 |
| #7       | Search: (Progression [Title/Abstract]) OR Progression [MeSH Terms]                           | 646,229 |

|     |                                                                                                                                                                                                                                                                                                                                                                                                                                                                                                                                                                                                                                                                                  |           |
|-----|----------------------------------------------------------------------------------------------------------------------------------------------------------------------------------------------------------------------------------------------------------------------------------------------------------------------------------------------------------------------------------------------------------------------------------------------------------------------------------------------------------------------------------------------------------------------------------------------------------------------------------------------------------------------------------|-----------|
| #8  | Search: (Critical [Title/Abstract]) OR Critical [MeSH Terms (Term not found)]                                                                                                                                                                                                                                                                                                                                                                                                                                                                                                                                                                                                    | 746,714   |
| #9  | Search: (Determinants [Title/Abstract]) OR Determinants [MeSH Terms (Term not found)]                                                                                                                                                                                                                                                                                                                                                                                                                                                                                                                                                                                            | 163,627   |
| #10 | Search: (Factors [Title/Abstract]) OR Factors [MeSH Terms (Term not found)]                                                                                                                                                                                                                                                                                                                                                                                                                                                                                                                                                                                                      | 2,149,407 |
| #11 | Search: (Indicators [Title/Abstract]) OR Indicators [MeSH Terms]                                                                                                                                                                                                                                                                                                                                                                                                                                                                                                                                                                                                                 | 402,721   |
| #12 | #1 OR #2<br>Search: ((China[MeSH Terms]) OR (China[Title/Abstract])) OR ((Chinese[Title/Abstract]) OR (Chinese[MeSH Terms]))                                                                                                                                                                                                                                                                                                                                                                                                                                                                                                                                                     | 468,159   |
| #13 | #3 OR #4 OR #5<br>Search: (((COVID-19[MeSH Terms]) OR (COVID-19[Title/Abstract])) OR ((coronavirus disease 2019[Title/Abstract]) OR (coronavirus disease 2019[MeSH Terms]))) OR ((SARS-CoV-2[MeSH Terms]) OR (SARS-CoV-2[Title/Abstract]))                                                                                                                                                                                                                                                                                                                                                                                                                                       | 87,174    |
| #14 | #6 OR #7 OR #8<br>Search: ((Severity [Title/Abstract]) OR (Severity [MeSH Terms])) OR ((Progression [MeSH Terms]) OR (Progression [Title/Abstract])) OR ((Critical [Title/Abstract]) OR (Critical [MeSH Terms]))                                                                                                                                                                                                                                                                                                                                                                                                                                                                 | 1,771,146 |
| #15 | #9 OR #10 OR #11<br>Search: (((Determinants[MeSH Terms]) OR (Determinants[Title/Abstract])) OR ((factors[Title/Abstract]) OR (factors[MeSH Terms]))) OR ((indicators[MeSH Terms]) OR (indicators[Title/Abstract]))                                                                                                                                                                                                                                                                                                                                                                                                                                                               | 2,628,494 |
| #16 | #13 AND #14 AND #15 AND #16<br>Search: (((((China[MeSH Terms]) OR (China[Title])) OR ((Chinese[Title]) OR (Chinese[MeSH Terms]))) AND (((COVID-19[MeSH Terms]) OR (COVID-19[Title/Abstract])) OR ((coronavirus disease 2019[Title/Abstract]) OR (coronavirus disease 2019[MeSH Terms]))) OR ((SARS-CoV-2[MeSH Terms]) OR (SARS-CoV-2[Title/Abstract]))) AND ((Severity [Title/Abstract]) OR (Severity [MeSH Terms])) OR ((Progression [MeSH Terms]) OR (Progression [Title/Abstract])) OR ((Critical [Title/Abstract]) OR (Critical [MeSH Terms])) AND (((Determinants[MeSH Terms]) OR (Determinants[Title/Abstract])) OR ((factors[Title/Abstract]) OR (factors[MeSH Terms])))) | 435       |

|  |                                                               |  |
|--|---------------------------------------------------------------|--|
|  | OR ((indicators[MeSH Terms]) OR (indicators[Title/Abstract])) |  |
|--|---------------------------------------------------------------|--|

#### Database4: EMBASE

| No. | Query                                                        |           |
|-----|--------------------------------------------------------------|-----------|
| #1  | 'china'/exp OR 'china'                                       | 2,450,664 |
| #2  | 'china':ti,ab,kw                                             | 236,377   |
| #3  | 'chinese'/exp OR 'chinese'                                   | 1,199,189 |
| #4  | 'chinese':ti,ab,kw                                           | 290,192   |
| #5  | #1 OR #2 OR #3 OR #4                                         | 2,598,752 |
| #6  | 'covid-19'/exp OR 'covid-19'                                 | 87,268    |
| #7  | 'covid-19':ti,ab,kw                                          | 75,510    |
| #8  | 'coronavirus disease 2019'/exp OR 'coronavirus disease 2019' | 78,636    |
| #9  | 'coronavirus disease 2019':ti,ab,kw                          | 15,396    |
| #10 | 'sars-cov-2'/exp OR 'sars-cov-2'                             | 34,835    |
| #11 | 'sars-cov-2':ti,ab,kw                                        | 26,549    |
| #12 | #6 OR #7 OR #8 OR #9 OR #10 OR #11                           | 90,445    |
| #13 | 'Severity'/exp OR 'Severity'                                 | 1,085,028 |
| #14 | 'Severity':ti,ab,kw                                          | 680,532   |
| #15 | 'Progression'/exp OR 'Progression'                           | 874,839   |
| #16 | 'Progression':ti,ab,kw                                       | 840,310   |
| #17 | 'Critical'/exp OR 'Critical'                                 | 1,299,485 |
| #18 | 'Critical':ti,ab,kw                                          | 940,916   |
| #19 | #13 OR #14 OR #15 OR #16 OR #17 OR #18                       | 3,079,482 |

|     |                                        |           |
|-----|----------------------------------------|-----------|
| #20 | 'determinants'/exp OR 'determinants'   | 205,528   |
| #21 | 'determinants':ti,ab,kw                | 195,668   |
| #22 | 'factors'/exp OR 'factors'             | 2,878,464 |
| #23 | 'factors':ti,ab,kw                     | 2,832,591 |
| #24 | 'indicators'/exp OR 'indicators'       | 220,412   |
| #25 | 'indicators':ti,ab,kw                  | 200,917   |
| #26 | #20 OR #21 OR #22 OR #23 OR #24 OR #25 | 3,202,215 |
| #27 | #5 AND #12 AND #19 AND #26             | 921       |

#### Database 5: Cochrane Library

| ID  | Search                                                                   |         |
|-----|--------------------------------------------------------------------------|---------|
| #1  | (China):ti,ab,kw (Word variations have been searched)                    | 14,052  |
| #2  | (Chinese):ti,ab,kw (Word variations have been searched)                  | 27,686  |
| #3  | #1 or #2                                                                 | 36,665  |
| #4  | (COVID-19):ti,ab,kw (Word variations have been searched)                 | 3,640   |
| #5  | (Coronavirus disease 2019):ti,ab,kw (Word variations have been searched) | 809     |
| #6  | (SARS-CoV-2):ti,ab,kw (Word variations have been searched)               | 175     |
| #7  | #4 or #5 or #6                                                           | 3,688   |
| #8  | (Severity):ti,ab,kw (Word variations have been searched)                 | 100,894 |
| #9  | (Progression):ti,ab,kw (Word variations have been searched)              | 64,697  |
| #10 | (Critical):ti,ab,kw (Word variations have been searched)                 | 24,344  |
| #11 | #8 or #9 or #10                                                          | 182,472 |
| #12 | (Determinants):ti,ab,kw (Word variations have been searched)             | 5,026   |

|     |                           |         |
|-----|---------------------------|---------|
| #13 | (factors):ti,ab,kw        | 184,575 |
| #14 | (indicators):ti,ab,kw     | 11,505  |
| #15 | #12 OR #13 OR #14         | 197,032 |
| #16 | #3 AND #7 AND #11 AND #15 | 5       |

#### Database 6: Web of Science

| ID  | Search                                                  |            |
|-----|---------------------------------------------------------|------------|
| #1  | TI=(China or Chinese)                                   | 1,001,546  |
| #2  | AB=(China or Chinese)                                   | 1,933,832  |
| #3  | AK=(China or Chinese)                                   | 214,032    |
| #4  | #3 OR #2 OR #1                                          | 2,126,022  |
| #5  | TI=(COVID-19 or coronavirus disease 2019 or SARS-CoV-2) | 92,554     |
| #6  | AB=(COVID-19 or coronavirus disease 2019 or SARS-CoV-2) | 94,201     |
| #7  | AK=(COVID-19 or coronavirus disease 2019 or SARS-CoV-2) | 35,262     |
| #8  | #7 OR #6 OR #5                                          | 109,802    |
| #9  | TI=(Severity or Progression or Critical)                | 558,469    |
| #10 | AB=( Severity or Progression or Critical)               | 3,818,754  |
| #11 | AK=( Severity or Progression or Critical)               | 161,295    |
| #12 | #11 OR #10 OR #9                                        | 4,081,547  |
| #13 | TI=(Determinants or factors or indicators)              | 1,975,117  |
| #14 | AB=(Determinants or factors or indicators)              | 11,664,313 |
| #15 | AK=(Determinants or factors or indicators)              | 725,093    |
| #16 | #15 OR #14 OR #13                                       | 12,272,832 |

|     |                           |     |
|-----|---------------------------|-----|
| #17 | #16 AND #12 AND #8 AND #4 | 936 |
|-----|---------------------------|-----|
